# Supplementary material for: High Prevalence of Alterations in DNA Mismatch Repair Genes of Lynch Syndrome in Pediatric Patients with Adrenocortical Tumors Carrying a Germline Mutation on TP53
Source: Cancers (Basel). 2020 Mar 7;12(3):621. doi: 10.3390/cancers12030621 (PMC7139318; doi:10.3390/cancers12030621)
Supplement: Supplementary file 1 [file cancers-12-00621-s001.xlsx]

## Sheet: Sheet1
Table S1: Pediatric cohort
Patient	Gender	Age	TP53 variant	Clinical	IHC	Weiss	Ki67	Wieneke	Tumor weight	Tumor size	Metastasis	Global survival time (years)
				presentation		Score			(g)	(cm)
#1	M	1.3	Arg337His	V	TMA	2	<5%	1	30	5	No	13.6
#2	F	0.9	Arg337His	V	FFPE	8	0.3	3	41	6.4	No	1.9
#3	F	1.5	Arg337His	V	TMA	5	0.1	1	5	3.8	No	16.2
#4	F	0.9	Arg337His	C/V	TMA	3	0.05	1	60	6	No	19
#5	F	2.1	Arg337His	V	TMA	1	0.05	1	20	4	No	14.9
#6	M	2.2	Arg337His	V	TMA	6	0.1	3	10.7	4.5	No	7.5
#7	M	2.2	Arg337His	V	TMA	4	NA	2	90	6.5	No	15.4
#8	F	2.5	Arg337His	V	TMA	1	0.05	2	5	3	No	22.2
#9	M	2.1	Arg337His	V	TMA	5	0.1	2	135	6	No	8.2
#10	F	3.3	Arg337His	C/V	FFPE	3	0.05	5	3.2	1.9	No	2.5
#11	F	0.8	Arg337His	C/V	TMA	6	0.15	2	40	3.5	No	25.7
#12	M	1.3	Arg337His	C/V	TMA	7	0.1	NA	40	5	No	19.1
#13	F*	15	Arg337His	C/V	TMA	8	0.5	NA	1230	20	Yes	1.8
#14	M	1	Arg337His	C/V	FFPE	5	0.1	3	NA	11.5	No	0
#15	F	2.5	Arg337His	V	TMA	6	0.1	2	55	6.5	No	10.4
#16	F	3.3	Arg337His	C/V	TMA	5	0.4	4	37.9	6	Yes	8.1
#17	F	0.9	Arg337His	V	TMA	4	0.1	0	135	8.5	Yes	12.6
#18	F	2.8	Arg337His	NA	FFPE	8	NA	5	66	7	No	1.2
#19	F	1.6	WT	V	TMA	3	0.05	1	31.3	4	No	8.1
#20	M	3.6	Arg337His	V	FFPE	4	0.1	1	8.2	5.5	No	4.7
#21	F	3	Arg337His	C/V	TMA	6	0.05	1	40	5	No	31.6
#22	F	1.2	Arg337His	C/V	TMA	5	0.1	1	10	3.7	No	0.3
#23	F	1.6	Arg337His	V	TMA	5	0.1	2	74	5	No	5.5
#24	F	2.7	Arg273His	V	TMA	3	<5%	0	NA	1.8	No	8.5
#25	M	9	WT	C	TMA	2	0	0	20	4.5	No	8.7
#26	F	3.1	Gly245Ser	C/V	TMA	7	0.3	5	650	13.5	Yes	0.2
#27	M*	2	Arg337His	V	TMA	5	0.15	1	4	1.5	No	13.8
#28	M	2.6	Arg337His	V	TMA	5	0.5	1	3	2.5	Yes	23.8
#29	F	1	Arg337His	C/V	TMA	6	0.2	3	112.7	6.5	No	6.3
#30	F	2.8	Arg337His	V	TMA	3	0	NA	30	5	No	13.9
#31	F	2.2	WT	C/V	TMA	2	0	NA	55	7	Yes	6.6
#32	F	1.9	Arg337His	NA	FFPE	5	<5%	1	10	2.7	No	4.6
#33	M	11.4	Arg337His	C/V	FFPE	2	0.05	0	45.6	10	No	3.1
#34	F	2.5	Arg337His	V	TMA	1	0	0	10	4.5	No	15.3
#35	M	2.3	Arg337His	V	TMA	5	0.3	3	10	3.5	No	0
#36	M*	0.9	Arg337His	C/V	FFPE	9	0.1	4	89	8.5	No	0.1
M: Male; F: Female; *: Dead of disease; V: Virilization; C: Cushing’s syndrome; NA: Not available; IHC: Immunohistochemistry; TMA: Tissue microarray; FFPE: Formalin-fixed and paraffin-embedded tumor sections.
